# Supplementary material for: Ultrafine MoS2 Nanosheets Vertically Patterned on Graphene for High-Efficient Li-Ion and Na-Ion Storage
Source: Front Chem. 2021 Dec 3;9:802788. doi: 10.3389/fchem.2021.802788 (PMC8677674; doi:10.3389/fchem.2021.802788)
Supplement: Supplementary file 1 [file Table1.DOCX]

Supplementary Material of

Ultrafine MoS2 Nanosheets Vertically Patterned on Graphene for High Efficient Li-Ion and Na-Ion Storage

**Chunguagn Wei1, Zhidong Hou2, Huanhuan Sun2, Jian-Gan Wang2,***

1Shenzhen Cubic-Science Co., Ltd., Nanshan District, Shenzhen 518052, China

2Center for Nano Energy Materials, State Key Laboratory of Solidification Processing, School of Materials Science and Engineering, Northwestern Polytechnical University, Xi’an 710072, China

*** Correspondence:** wangjiangan@nwpu.edu.cn

**Supplementary Figure S1.** TGA curves of pure MoS2, rGO@MoS2 and rGO@MoS2-C.

**Supplementary Figure S2.** CV curves of (a) MoS2 and (b) MoS2@rGO-C.

**Supplementary Figure S3.** Galvanostatic discharge/charge profiles of (a) MoS2 and (b) MoS2@rGO-C.

**Supplementary Table S1.** A comparison of Na-ion storage performance of MoS2-based materials.

| Materials | Specific capacitance (mAh/g) | Cycling (mAh/g) | MoS2 content | Ref. |
| --- | --- | --- | --- | --- |
| MoS2/rGO | 702 (20 mA/g) | 430 (100 cycles) | 68.7 wt.% | [1] |
| MoS2/rGO | 305 (100 mA/g) | 305 (50 cycles) | 64 wt.% | [2] |
| MoS2/CNT | 539 (50 mA/g) | 504 (50 cycles) | 76.7 wt.% | [3] |
| MoS2/C | 475 (100 mA/g) | 404 (100 cycles) | 62.3 wt.% | [4] |
| MoS2/C paper | 320 (80 mA/g) | 286 (100 cycles) | 95.1 wt.% | [5] |
| MoS2/SWNTs | 410 (200 mA/g) | 390 (100 cycles) | 80 wt.% | [6] |
| MoS2/C | 600 (67 mA/g) | 520 (50 cycles) | 66.7 wt.% | [7] |
| MoS2/rGO | 380 (200 mA/g) | 442 (100 cycles) | 90.3 wt.% | [8] |
| MoS2/C | 494 (100 mA/g) | 432 (100 cycles) | 69 wt.% | [9] |
| MoS2/rGO | 338 (25 mA/g) | 218 (20 cycles) | 60 wt.% | [10] |
| MoS2/rGO | 573 (200 mA/g) | 480 (50 cycles) | 83.6 wt.% | [11] |
| MoS2/C | 620 (200 mA/g) | 477 (200 cycles) | 88 wt.% | [12] |
| MoS2/CNF | 381.7 (100mA/g) | 283.9 (600 cycles) | 83.2 wt.% | [13] |
| MoS2/C | 659 (200 mA/g) | 619.2 (100 cycles) | 41.2 wt.% | [14] |
| MoS2/C | 235 (200 mA/g) | 235 (350 cycles) | 98.7 wt.% | [15] |
| MoS2/graphene | 340 (50 mA/g) | 313 (200 cycles) | - | [16] |
| DP-MoS2 | 280 (500 mA/g) | 280 (200 cycles) | 100 wt.% | [17] |
| **MoS2/rGO** | **660 (50 mA/g)** | **581 (150 cycles)** | **82 wt.%** | **Our work** |

**Reference**

[1] X. Xie, Z. Ao, D. Su, J. Zhang, G. Wang, Adv. Funct. Mater. 25 (2015) 1393-1403.

[2] W. Qin, T. Chen, L. Pan, L. Niu, B. Hu, D. Li, J. Li, Z. Sun, Electrochim. Acta 153 (2015) 55-61.

[3] S. Zhang, X. Yu, H. Yu, Y. Chen, P. Gao, C. Li, C. Zhu, ACS Appl. Mater. interfaces, 6 (2014) 21880-21885.

[4] S.K. Park, J. Lee, S. Bong, B. Jang, K.D. Seong, Y. Piao, ACS appl. Mater. interfaces, 8 (2016) 19456-19465.

[5] X. Xie, T. Makaryan, M. Zhao, K.L. Van Aken, Y. Gogotsi, G. Wang, Adv. Energy Materials, 6 (2016) 1502161.

[6] Y. Liu, X. He, D. Hanlon, A. Harvey, J.N. Coleman, Y. Li, ACS Nano, 10 (2016) 8821-8828.

[7] J. Wang, C. Luo, T. Gao, A. Langrock, A.C. Mignerey, C. Wang, Small, 11 (2015) 473-481.

[8] R. Wang, S. Gao, K. Wang, M. Zhou, S. Cheng, K. Jiang, Sci. Rep. 7 (2017) 7963.

[9] Y. Lu, Q. Zhao, N. Zhang, K. Lei, F. Li, J. Chen, Adv. Func. Mater. 26 (2016) 911-918.

[10] L. David, R. Bhandavat, G. Singh, ACS Nano 8 (2014) 1759–1770.

[11] S.H. Choi, Y.N. Ko, J.-K. Lee, Y.C. Kang, Adv. Funct. Mater. 25 (2015) 1780–1788.

[12] Z.-T. Shi, W. Kang, J. Xu, Y.-W. Sun, M. Jiang, T.-W. Ng, H.-T. Xue, D.Y.W. Yu, W. Zhang, C.-S. Lee, Nano Energy 22 (2016) 27–37.

[13] X. Xiong, W. Luo, X. Hu, C. Chen, L. Qie, D. Hou, Y. Huang, Sci. Rep. 5 (2015) 9254.

[14] W. Ren, H. Zhang, C. Guan, C. Cheng, Adv. Funct. Mater. 27 (2017) 1702116.

[15] Y.-L. Ding, P. Kopold, K. Hahn, P.A.v. Aken, J. Maier, Y. Yu, Adv. Mater. 28 (2016) 7774–7782.

[16] X. Geng, Y. Jiao, Y. Han, A. Mukhopadhyay, L. Yang, H. Zhu, Adv. Funct. Mater. (2017) 1702998.

[17] J. Wu, J. Liu, J. Cui, S. Yao, M. Ihsan-Ul-Haq, N. Mubarak, E. Quattrocchi, F. Ciucci, J.-K. Kim, A, 8 (2020) 2114-2122.
